# Supplementary material for: Crosstalk between CD64+MHCII+ macrophages and CD4+ T cells drives joint pathology during chikungunya
Source: PubMed Central journal article supplement (PMC10940729; doi:10.1038/s44321-024-00028-y), 2024-02-08
Supplement: 44321_2024_28_MOESM1_ESM.pdf [file 44321_2024_28_MOESM1_ESM.pdf]

## **Appendix**

### **Crosstalk between CD64<sup>+</sup>MHCII<sup>+</sup> macrophages and CD4<sup>+</sup> T cells drives joint pathology during chikungunya**

Authors: Fok-Moon Lum<sup>1,†,\*</sup>, Yi-Hao Chan<sup>1,†</sup>, Teck-Hui Teo<sup>1</sup>, Etienne Becht<sup>2,3</sup>, Siti Naqiah Amrun<sup>1</sup>, Karen W.W. Teng<sup>2</sup>, Siddesh V. Hartimath<sup>4</sup>, Nicholas K.W. Yeo<sup>1</sup>, Wearn-Xin Yee<sup>2</sup>, Nicholas Ang<sup>2</sup>, Anthony M. Torres-Ruesta<sup>1</sup>, Siew-Wai Fong<sup>1</sup>, Julian L. Goggi<sup>4</sup>, Evan W. Newell<sup>2,3</sup>, Laurent Renia<sup>1,2,5,6</sup>, Guillaume Carissimo<sup>1,7</sup> and Lisa F.P. Ng<sup>1,8,9,10,11,\*</sup>

\*Correspondence: [lisa\\_ng@idlabs.a-star.edu.sg](mailto:lisa_ng@idlabs.a-star.edu.sg); [lum\\_fok\\_moon@idlabs.a-star.edu.sg](mailto:lum_fok_moon@idlabs.a-star.edu.sg)

**This PDF file includes:**  
Appendix Figure S1: Page 2

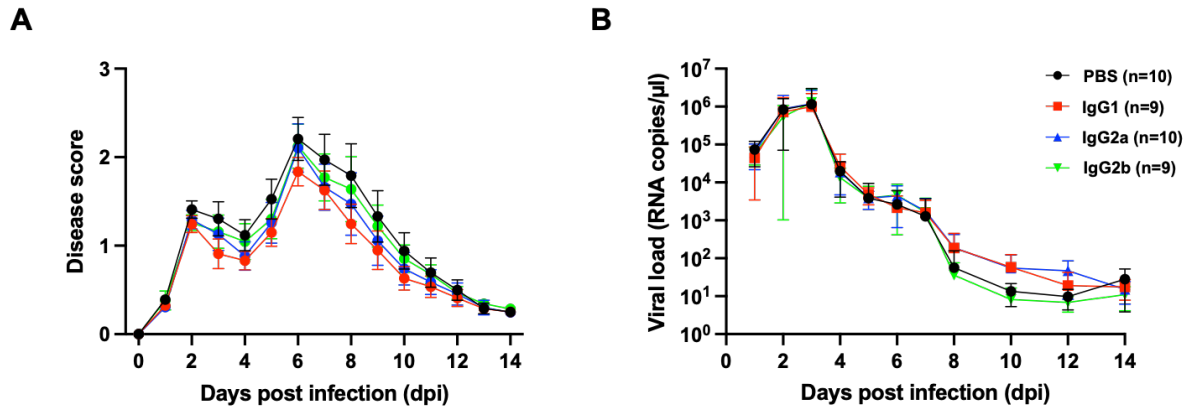

**Appendix Figure S1: Treatment of CHIKV-infected animals with IgG1, IgG2b and IgG2a.**

**(A-B)** Wildtype animals were infected with  $1 \times 10^6$  PFU of CHIKV in the right footpad and subsequently treated with rat IgG1 antibodies (0-, 2- and 4-days post-infection (dpi)), rat IgG2b (-1 and 4 dpi) and rat IgG2a (4 dpi). Joint-footpad swelling **(A)** and viral RNA load **(B)** were monitored over 14 days. All data were from biological replicates obtained from two independent experiments. Data are presented as mean  $\pm$  SD. Data comparisons between the groups receiving antibodies against the PBS control group were performed with non-parametric Mann-Whitney *U* test (two-tailed). No significance was observed.
