# Supplementary material for: Crosstalk between CD64+MHCII+ macrophages and CD4+ T cells drives joint pathology during chikungunya
Source: PubMed Central journal article supplement (PMC10940729; doi:10.1038/s44321-024-00028-y), 2024-02-08
Supplement: 44321_2024_28_MOESM12_ESM.pdf [file 44321_2024_28_MOESM12_ESM.pdf]

## Expanded View Figures

**Figure EV1. High-dimensional analysis of mass cytometry data and Immunophenotyping gating strategy.**

(A) Cluster ID annotation with heatmap. Cluster IDs are indicated in rows, while surface marker expression levels are indicated by the columns. The color represents the relative mean signal intensity of a surface marker. Blue and red represent low and high intensity, respectively. (B) Cellular infiltrates in the CHIKV-infected joint-footpad at 6 days post-infection (dpi) were determined with flow cytometry. Briefly, live CD45<sup>+</sup> immune cells were gated out before the CD3<sup>+</sup> (inclusive of CD4<sup>+</sup> and CD8<sup>+</sup>) T cells, CD3<sup>+</sup>NK1.1<sup>+</sup> NKT cells, CD11b<sup>+</sup>Ly6G<sup>+</sup> neutrophils, NK1.1<sup>+</sup> NK cells, CD11b<sup>+</sup>Ly6C<sup>+</sup> monocytes and CD64<sup>+</sup> macrophages were identified. Plots shown are representative of a single CHIKV-infected mouse.

**A**

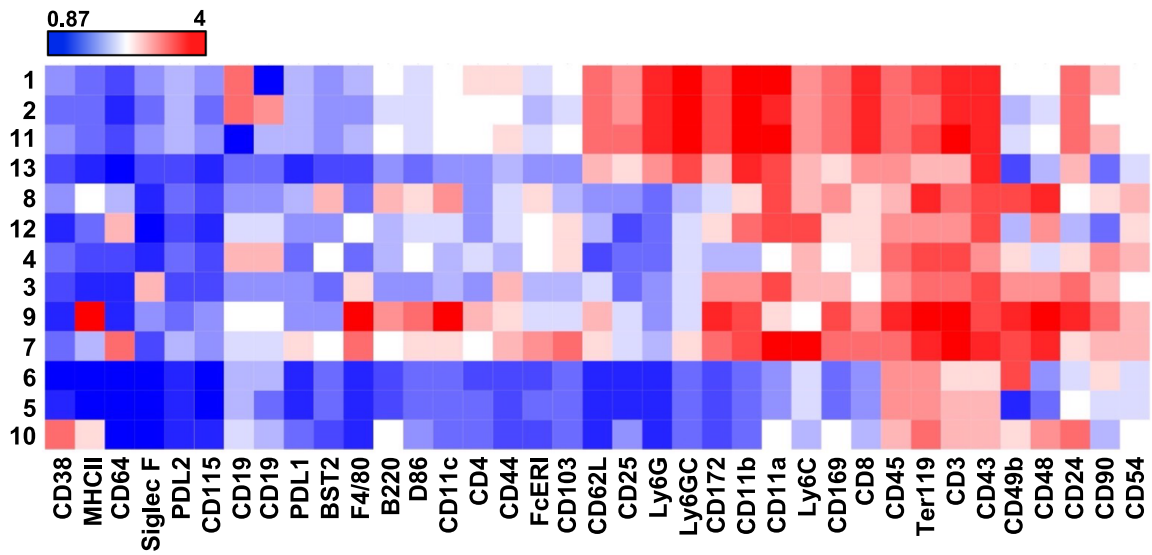

**B**

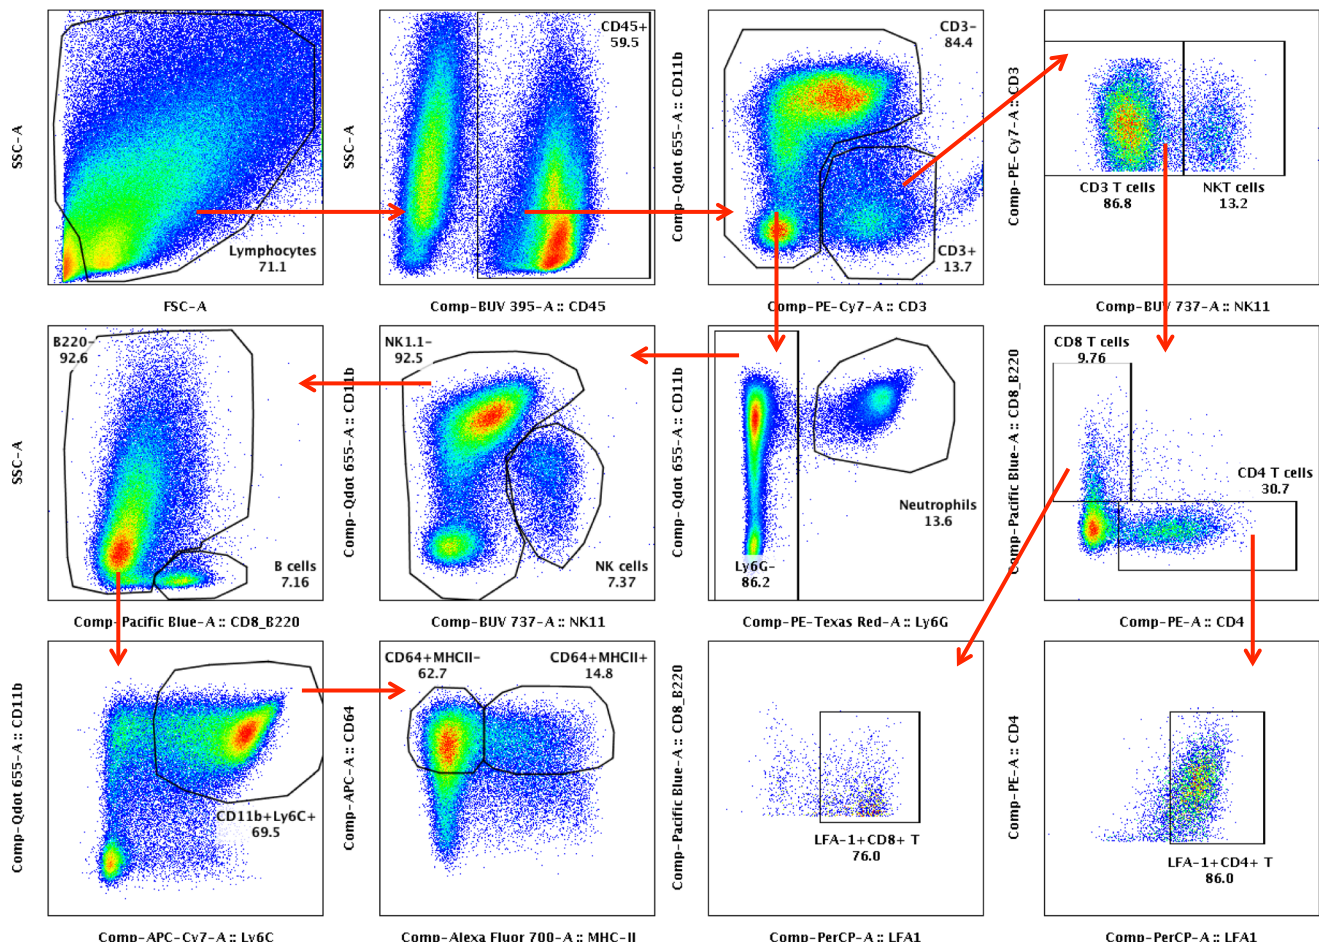

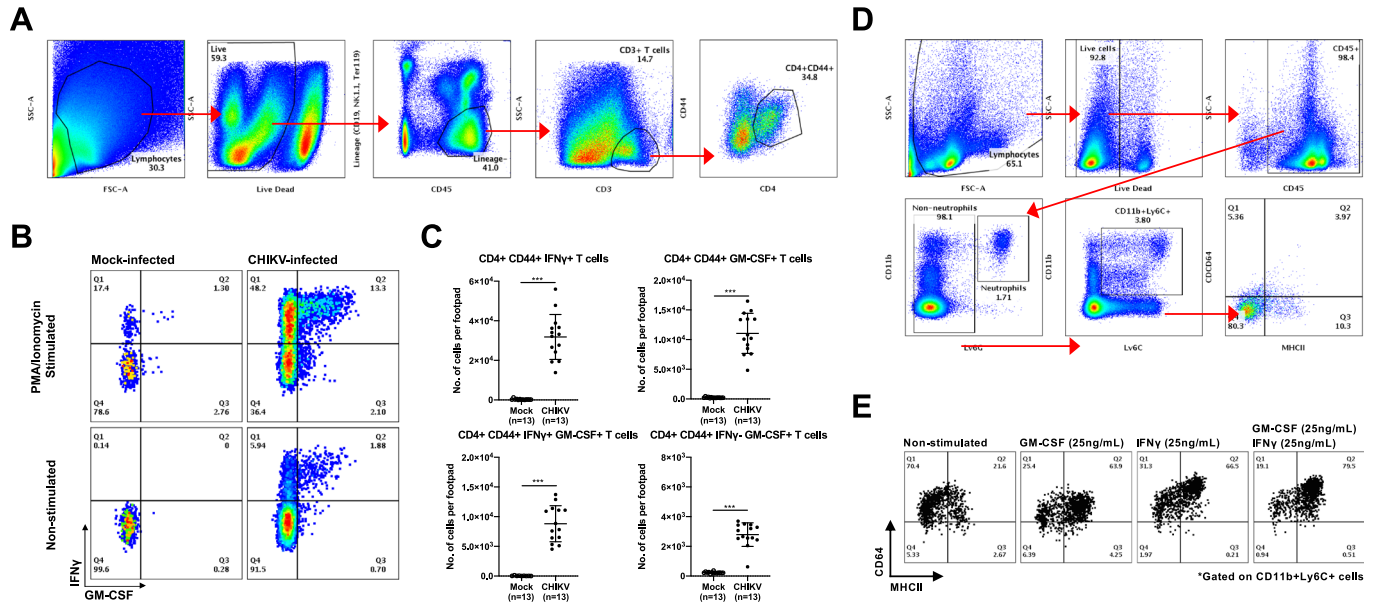

**Figure EV2. Intracellular staining reveals presence of IFN $\gamma$ - and GM-CSF-producing CD4<sup>+</sup>CD44<sup>+</sup> T cells during CHIKV infection.**

(A) Joint-footpad cells from non-infected and CHIKV-infected animals were harvested at 6 dpi and were subjected to stimulation with ionomycin and Phorbol Myristate Acetate (PMA) for 4 h. Stimulated cells were subsequently stained for the presence of GM-CSF and IFN $\gamma$  in CD4<sup>+</sup>CD44<sup>+</sup> memory/effector T cells. Representative electronic gating strategy to isolate CD4<sup>+</sup>CD44<sup>+</sup> T cells from joint-footpad cells. Plots shown are concatenated from CHIKV-infected samples. (B) Representative flow cytometry plot illustrating the gating strategy in the identification of GM-CSF and IFN $\gamma$  within the CD4<sup>+</sup>CD44<sup>+</sup> T cells. (C) Dotplots showing the numbers of the various identified subsets within the joint-footpads. Data were from biological replicates obtained from two independent experiments. All data are presented as mean  $\pm$  SD. Data comparisons between the groups were performed with non-parametric Mann-Whitney *U* test (two-tailed). IFN $\gamma$ <sup>+</sup> T cells, \*\*\**P* = 0.0000000499; GM-CSF<sup>+</sup> T cells, \*\*\**P* = 0.0000000499; IFN $\gamma$ <sup>-</sup>GM-CSF<sup>+</sup> T cells, \*\*\**P* = 0.0000000499; IFN $\gamma$ <sup>-</sup>GM-CSF<sup>-</sup> T cells, \*\*\**P* = 0.0000000499. (D) Fresh blood was obtained from non-infected animals. Red blood cells were subsequently lysed and live cells were stained with a commercially available live/dead dye before being stained with a cocktail of antibodies targeting surface markers CD45, CD11b, Ly6G, Ly6C, CD64, and MHCII. Live CD45<sup>+</sup> cells were firstly identified, and non-neutrophils were gated next. CD11b<sup>+</sup>Ly6C<sup>+</sup> monocytes were identified from the non-neutrophils and were shown to be low in CD64 and MHCII expression (Q4). Plots shown are representative of a single non-infected mouse. (E) Peripheral whole blood was obtained from non-infected animals and were subjected to GM-CSF and IFN $\gamma$  stimulation after removal of the red blood cells. Stimulated cells were harvested 24 h later and stained for the identification of monocytes and macrophage subsets. Representative flow cytometry plots showing the gating strategy used to identify CD64<sup>+</sup>MHCII<sup>+</sup> cells among the precursor CD11b<sup>+</sup>Ly6C<sup>+</sup> monocytes.

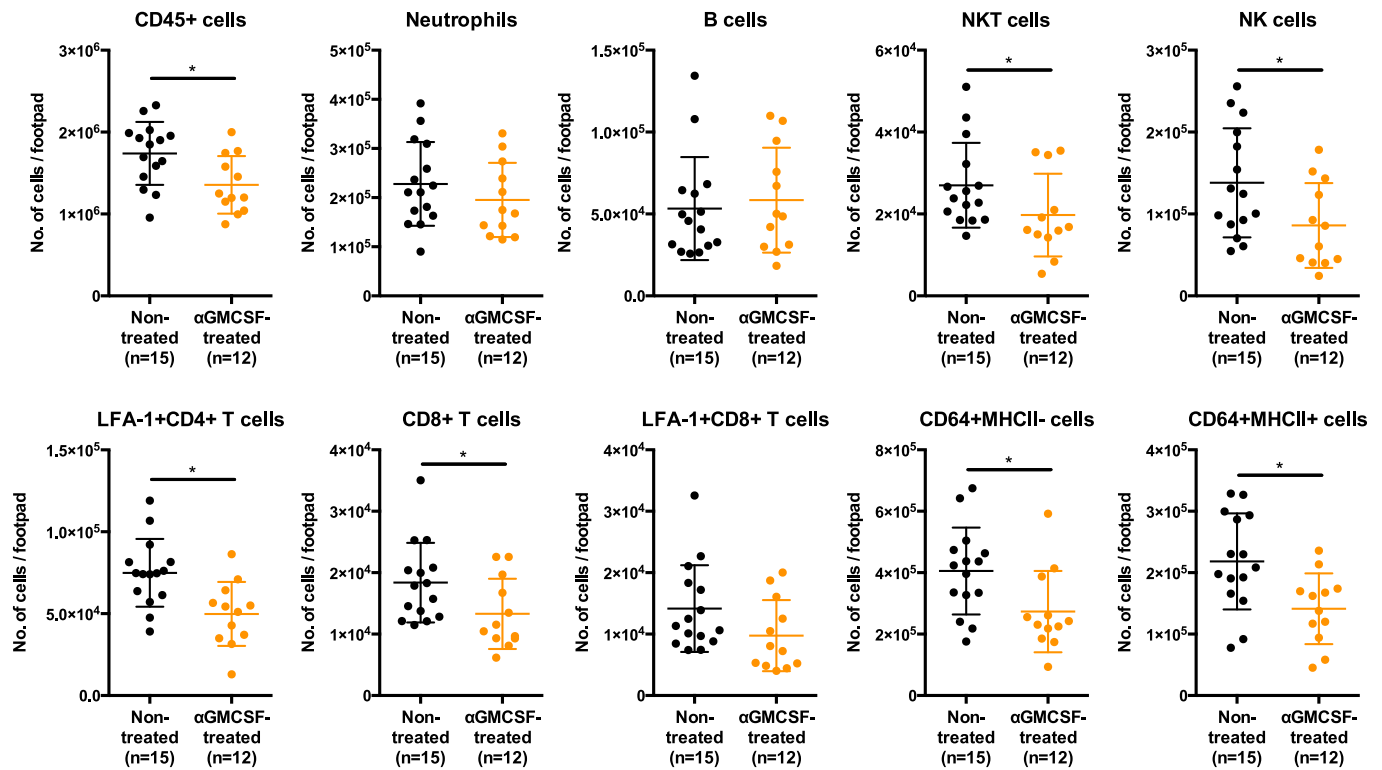

**Figure EV3. Depletion of GM-CSF alters the numbers of immune cells infiltrating the joint-footpad.**

CHIKV infection ( $1 \times 10^6$  PFU) was performed in the right footpad of wild-type animals. Four days post-infection (dpi), anti-GM-CSF antibodies were given intraperitoneally. Subsequently, numbers of infiltrating CD45<sup>+</sup> cells, neutrophils, B cells, NKT cells, NK cells, LFA-1<sup>+</sup>CD4<sup>+</sup> T cells, CD8<sup>+</sup> T cells, LFA-1<sup>+</sup>CD4<sup>+</sup> T cells, CD11b<sup>+</sup>Ly6C<sup>+</sup> cells, CD64<sup>+</sup>MHCII<sup>-</sup> cells and CD64<sup>+</sup>MHCII<sup>+</sup> cells were obtained following immunophenotyping of the joint-footpad at 6 days post-infection (dpi). Data were from biological replicates obtained from two independent experiments. All data are presented as mean  $\pm$  SD. Data comparisons between the groups were performed with non-parametric Mann-Whitney *U* test (two-tailed): CD45<sup>+</sup>, \**P* = 0.0139; NKT, \**P* = 0.0469; NK, \**P* = 0.0214; LFA-1<sup>+</sup>CD4<sup>+</sup> T, \**P* = 0.031; CD8<sup>+</sup> T, \**P* = 0.0281; CD64<sup>+</sup>MHCII<sup>-</sup>, \**P* = 0.0186; CD64<sup>+</sup>MHCII<sup>+</sup>, \**P* = 0.0161.

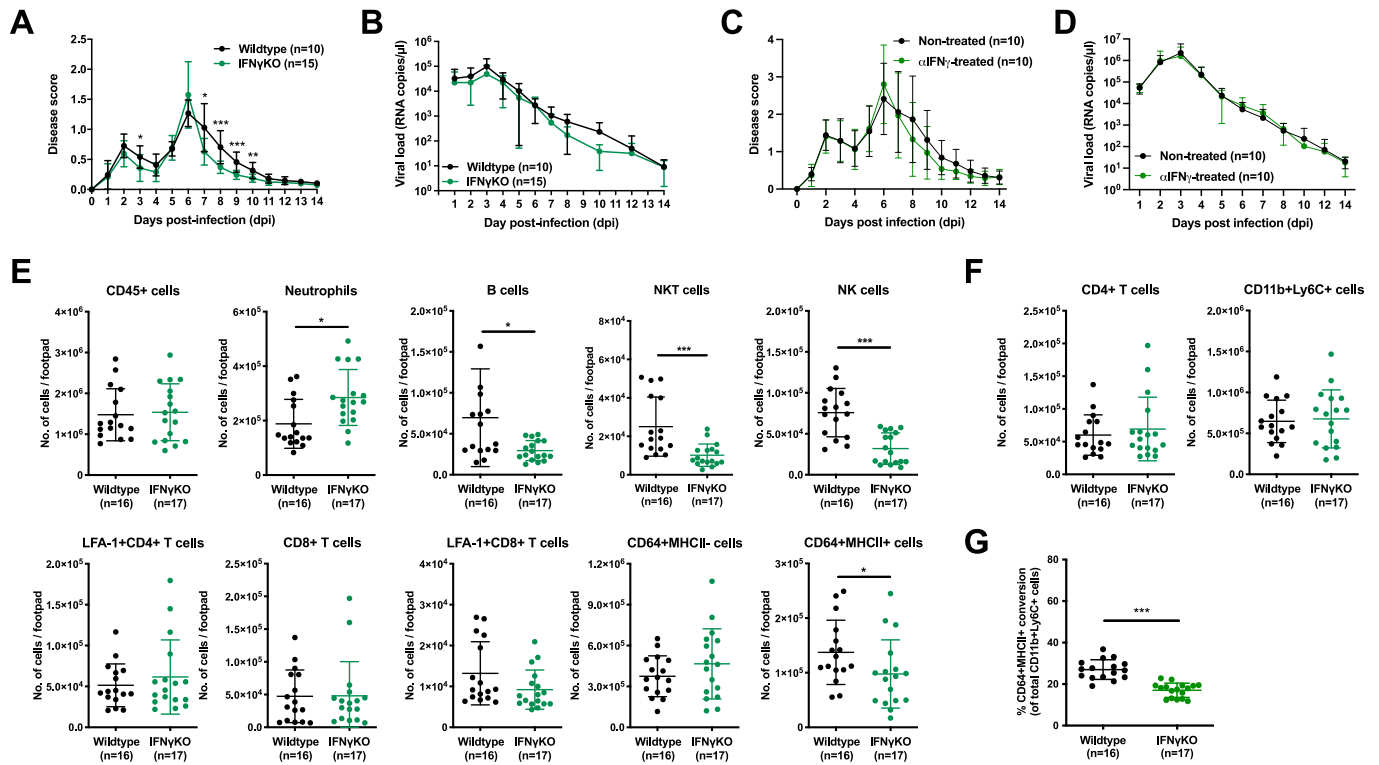

**Figure EV4. Absence of IFN $\gamma$  alters the conversion of CD64<sup>+</sup>MHCII<sup>+</sup> macrophages in the joint-footpad.**

(A,B) IFN $\gamma$ KO animals were infected with  $1 \times 10^6$  PFU of CHIKV in the right footpad. Joint-footpad swelling (A) and viral RNA load (B) were monitored over 14 days. Data were from biological replicates obtained from two independent experiments and presented as mean  $\pm$  SD. Comparisons between the groups were performed with non-parametric Mann-Whitney *U* test (two-tailed). For footpad swelling: 3 dpi, \**P* = 0.0395; 7 dpi, \**P* = 0.0216; 8 dpi, \*\*\**P* = 0.0000214; 9 dpi, \*\*\**P* = 0.0003; 10 dpi, \*\**P* = 0.0051. (C,D) Wild-type animals were infected with  $1 \times 10^6$  PFU of CHIKV in the right footpad and were treated with anti-IFN $\gamma$  antibodies at 0-, 2- and 4-days post-infection (dpi). Joint-footpad swelling (C) and viral RNA load (D) were monitored over 14 days. Data were from biological replicates obtained from two independent experiments and presented as mean  $\pm$  SD. (E-G) Immunophenotyping of IFN $\gamma$ KO joint-footpad was performed at 6 dpi to determine the numbers of infiltrating CD45<sup>+</sup> cells, neutrophils, B cells, NKT cells, NK cells, LFA-1<sup>+</sup>CD4<sup>+</sup> T cells, CD8<sup>+</sup> T cells, LFA-1<sup>+</sup>CD8<sup>+</sup> T cells, CD64<sup>+</sup>MHCII<sup>+</sup> cells and CD64<sup>+</sup>MHCII<sup>+</sup> cells (E). Numbers of joint-footpad infiltrating CD4<sup>+</sup> T cells and CD11b<sup>+</sup>Ly6C<sup>+</sup> monocytes in CHIKV-infected wild type or IFN $\gamma$ KO animals is shown (F). Percentage differentiation of CD11b<sup>+</sup>Ly6C<sup>+</sup> monocytes into CD64<sup>+</sup>MHCII<sup>+</sup> macrophages in CHIKV-infected wild type or IFN $\gamma$ KO animals is shown (G). Data were from biological replicates obtained from two independent experiments and presented as mean  $\pm$  SD. Comparisons between the groups were performed with non-parametric Mann-Whitney *U* test (two-tailed). For neutrophils, \**P* = 0.0136; B cells, \**P* = 0.0136; NKT, \*\*\**P* = 0.0002; NK, \*\*\**P* = 0.0001; CD64<sup>+</sup>MHCII<sup>+</sup>, \**P* = 0.0207; for % CD64<sup>+</sup>MHCII<sup>+</sup> conversion (G), \*\*\**P* = 0.00000105.

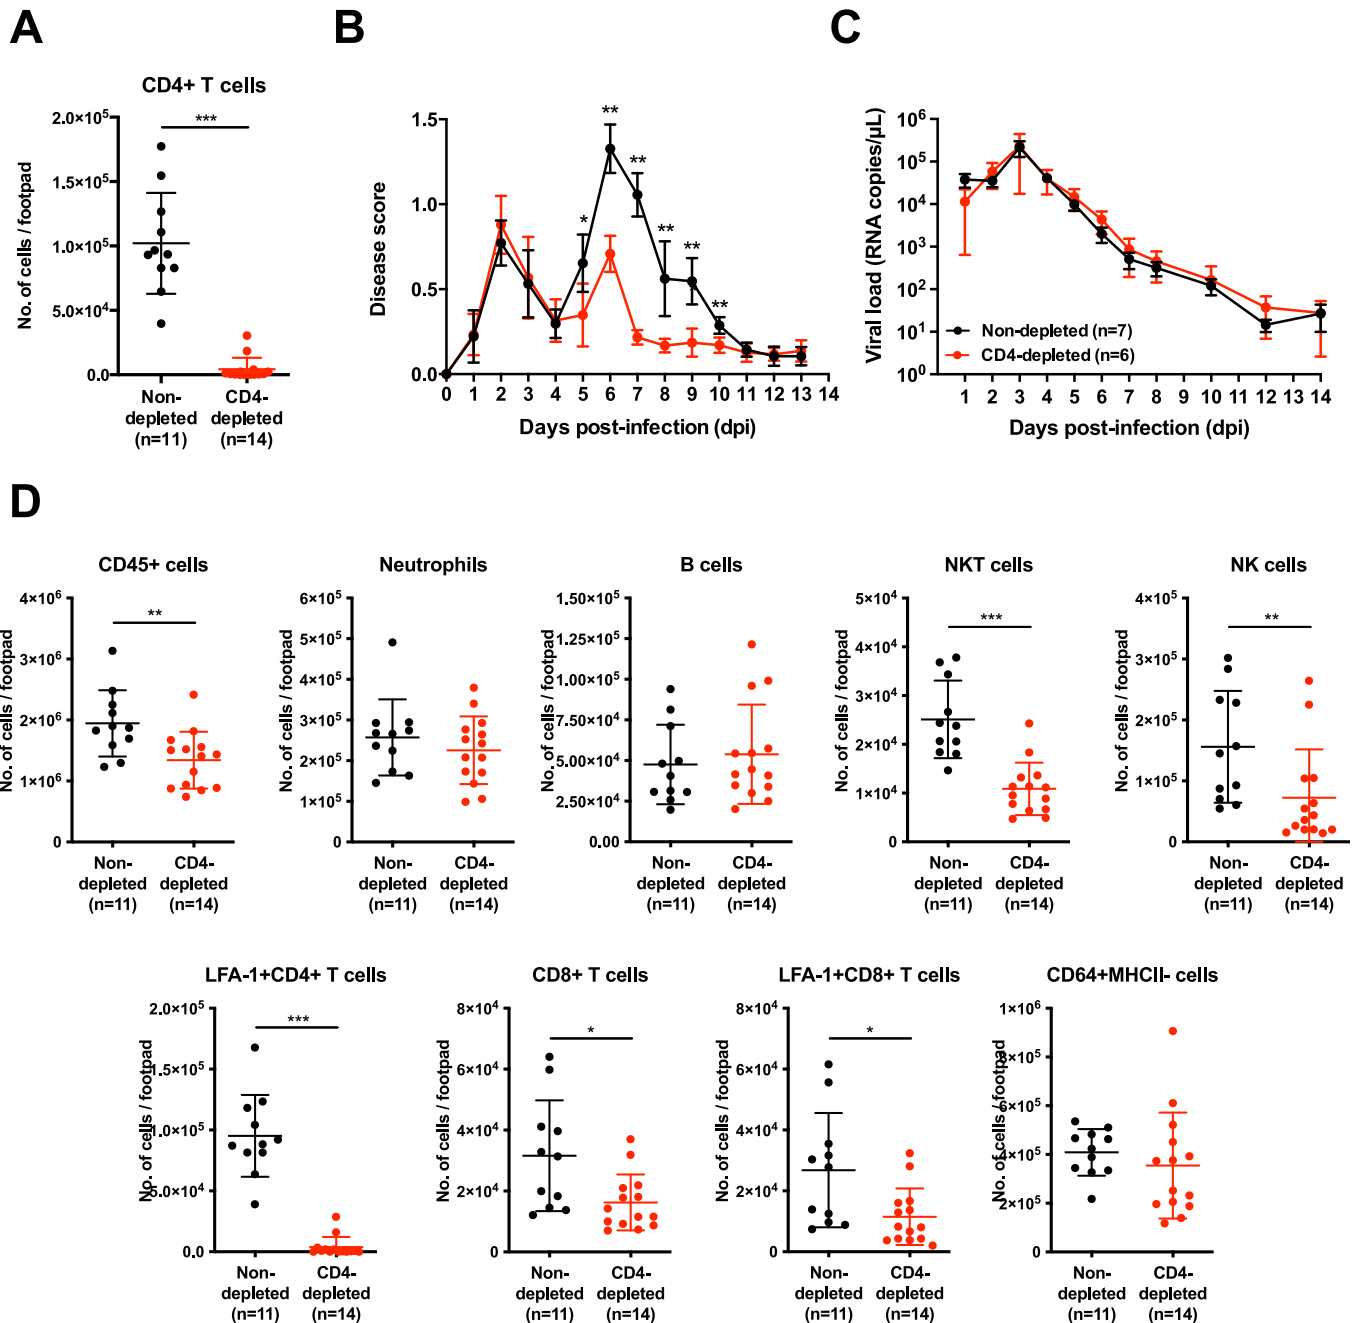

**Figure EV5. CD4-depletion reduces CHIKV disease severity.**

(A) Wild-type animals were infected with  $1 \times 10^6$  PFU of CHIKV in the right footpad and anti-CD4 antibodies were given intraperitoneally at -1 and 4 days post-infection (dpi). Immunophenotyping of joint-footpad was performed at 6 dpi to determine the numbers of infiltrating CD4<sup>+</sup> T cells. Data were from biological replicates obtained from two independent experiments and presented as mean  $\pm$  SD. Data comparisons between the groups were performed with non-parametric Mann-Whitney *U* test (two-tailed). CD4<sup>+</sup> T cells, \*\*\**P* = 0.000000449. (B,C) Joint-footpad swelling (B) and viral RNA load (C) of CHIKV-infected animals with or without administration of anti-CD4 antibodies, over a period of 14 days. Data were from biological replicates obtained from two independent experiments and presented as mean  $\pm$  SD. Data comparisons between the groups were performed with non-parametric Mann-Whitney *U* test (two-tailed). For footpad swelling: 5 dpi, \**P* = 0.0192; 6 dpi, \*\**P* = 0.0012; 7 dpi, \*\**P* = 0.0012; 8 dpi, \*\**P* = 0.0012; 9 dpi, \*\**P* = 0.0012; 10 dpi, \*\**P* = 0.0023. (D) Numbers of infiltrating CD45<sup>+</sup> cells, neutrophils, B cells, NKT cells, NK cells, LFA-1<sup>+</sup>CD4<sup>+</sup> T cells, CD8<sup>+</sup> T cells, LFA-1<sup>+</sup>CD8<sup>+</sup> T cells, CD11b<sup>+</sup>Ly6C<sup>+</sup> cells and CD64<sup>+</sup>MHCII<sup>-</sup> cells were determined following immunophenotyping of the joint-footpad at 6 dpi (A). Data were from biological replicates obtained from two independent experiments and presented as mean  $\pm$  SD. Data comparisons between the groups were performed with non-parametric Mann-Whitney *U* test (two-tailed). CD45<sup>+</sup>, \*\**P* = 0.0042; NKT, \*\*\**P* = 0.0000306; NK, \*\**P* = 0.0075; LFA-1<sup>+</sup>CD4<sup>+</sup> T, \*\*\**P* = 0.000000449; CD8<sup>+</sup>, \**P* = 0.0108; LFA-1<sup>+</sup>CD8<sup>+</sup> T, \**P* = 0.0179.
